# Supplementary material
Source: publisher figshare collection journal article supplement (https://acs.figshare.com/ndownloader/files/3949876)
Supplement: Supplementary file 1 [file 3949876]

# **Lipoprotein-Based Nanoparticles Rescue the Memory Loss of Mice with Alzheimers Disease by Accelerating the Clearance of Amyloid-Beta**

Qingxiang Song,<sup>†</sup> Meng Huang,<sup>†</sup> Lei Yao,<sup>†</sup> Xiaolin Wang,<sup>†</sup> Xiao Gu,<sup>†</sup> Juan Chen,<sup>‡</sup> Jun Chen,<sup>§</sup> Jialin Huang,<sup>†</sup> Quanyin Hu,<sup>§</sup> Ting Kang,<sup>§</sup> Zhengxing Rong,<sup>†</sup> Hong Qi,<sup>†</sup> Gang Zheng,<sup>‡,\*</sup> Hongzhuan Chen,<sup>†,\*</sup> and Xiaoling Gao<sup>†,\*</sup>

<sup>†</sup>Department of Pharmacology, Institute of Medical Sciences, Shanghai Jiao Tong University School of Medicine, 280 South Chongqing Road, Shanghai, 200025, PR China

<sup>‡</sup>Department of Medical Biophysics and Ontario Cancer Institute, University of Toronto, Toronto, Ontario M5G 1L7, Canada

<sup>§</sup>Department of Pharmaceutics, Key Laboratory of Smart Drug Delivery, Ministry of Education & PLA, School of Pharmacy, Fudan University, 826 Zhangheng Road, Shanghai 201203, PR China

\* Address correspondence to [gzheng@uhnresearch.ca](mailto:gzheng@uhnresearch.ca), [hongzhuan.chen@hotmail.com](mailto:hongzhuan.chen@hotmail.com) and [shellygao1@sjtu.edu.cn](mailto:shellygao1@sjtu.edu.cn)

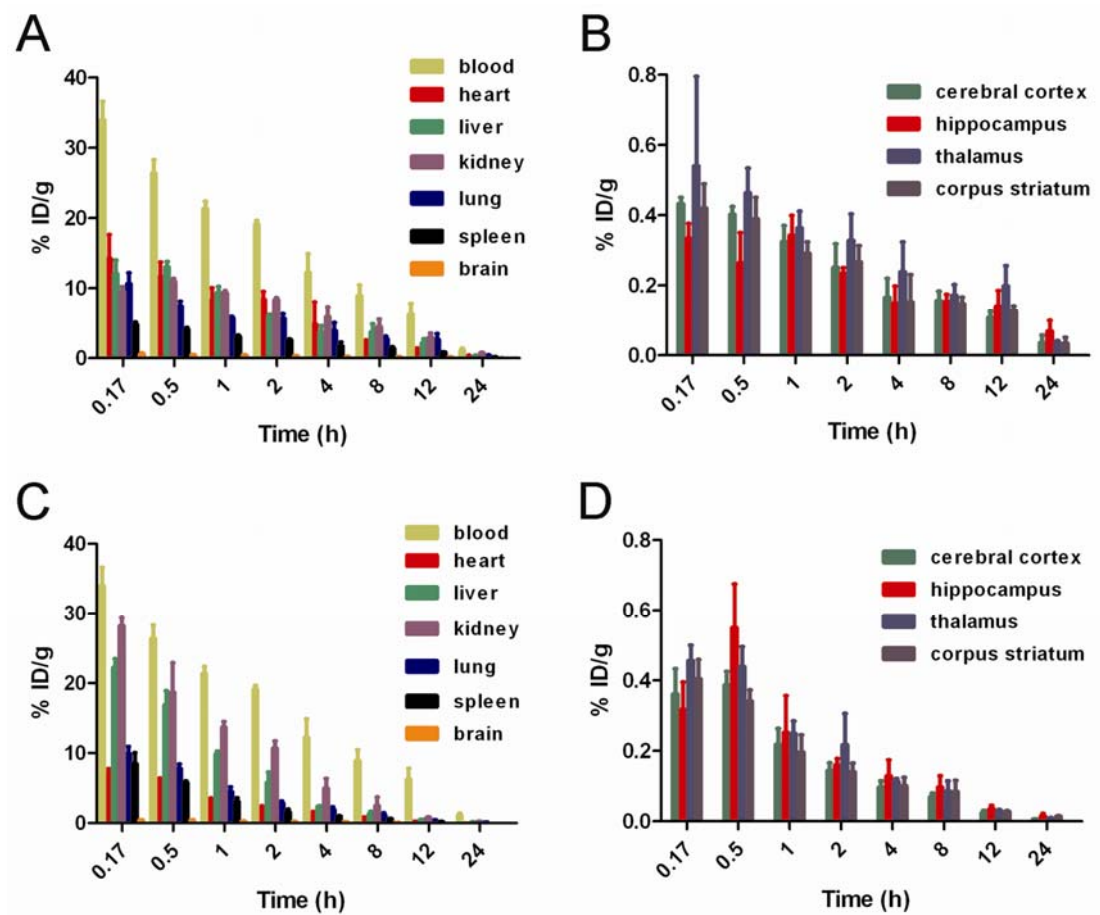

**Figure S1.** Biodistribution of  $^{125}\text{I}$ -ApoE3-rHDL and  $^{125}\text{I}$ -ApoE3 following intravenous administration. % ID/g, percentage injected dose per gram tissue. (A) Biodistribution of  $^{125}\text{I}$ -ApoE3-rHDL in the blood and major organs; (B) Biodistribution of  $^{125}\text{I}$ -ApoE3-rHDL in the brain cerebral cortex, hippocampus, thalamus and corpus striatum; (C) Biodistribution of  $^{125}\text{I}$ -ApoE3 in the blood and major organs; (D) Biodistribution of  $^{125}\text{I}$ -ApoE3 in the brain cerebral cortex, hippocampus, thalamus and corpus striatum.

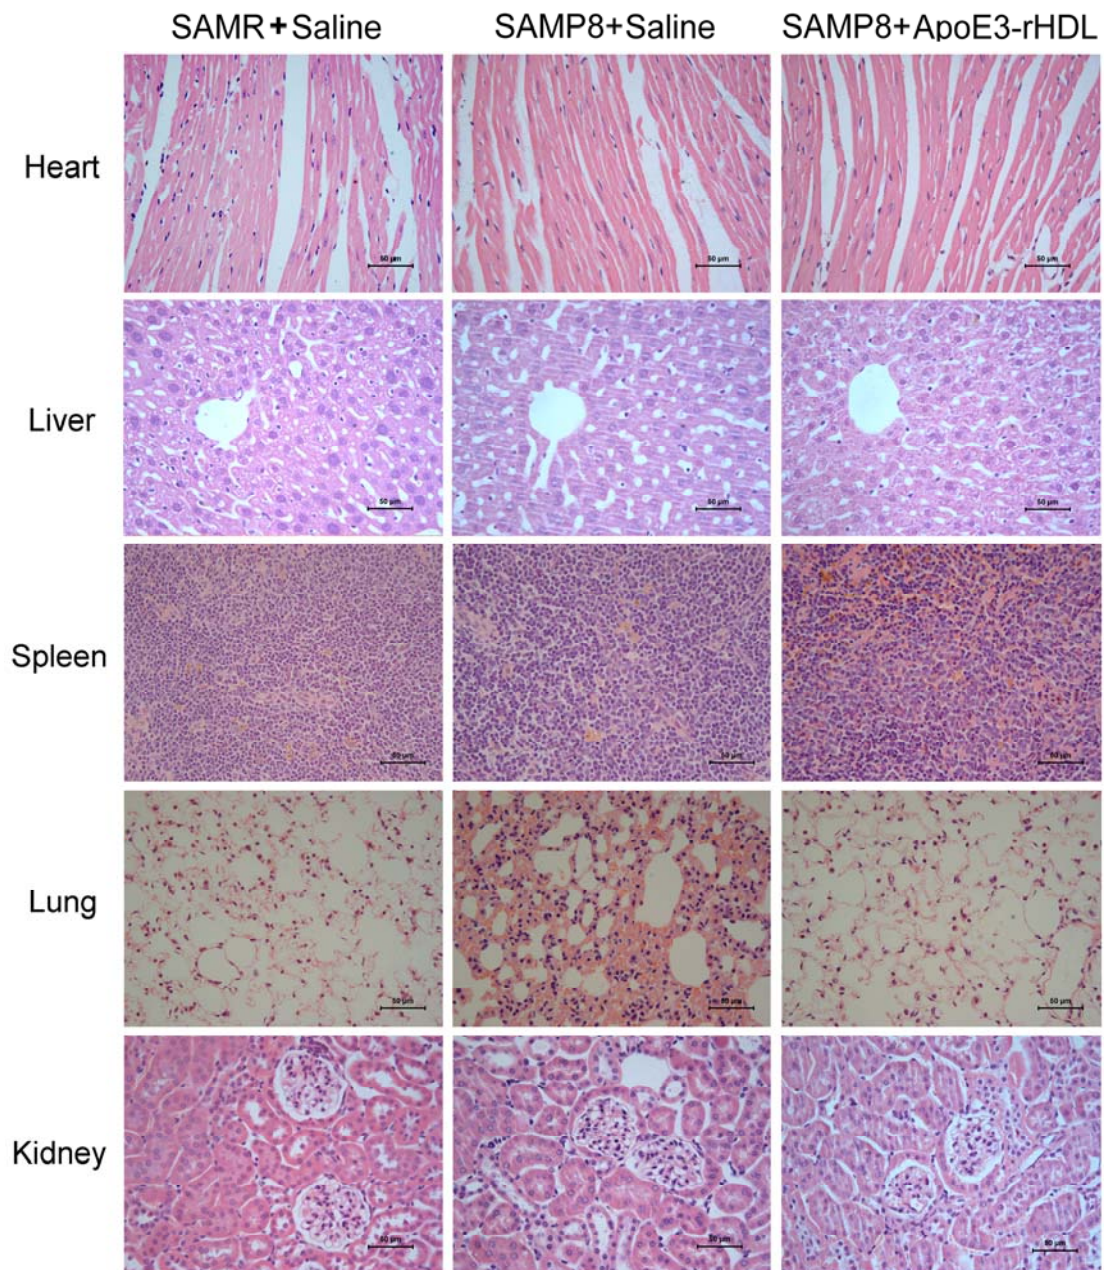

**Figure S2.** ApoE3-rHDL did not induce observable pathological changes in the heart, liver, spleen and kidney but alleviated the inflammatory response in the lung of SAMP8 mice. Seven-month-old SAMP8 mice ( $n=8-9$  per group) were treated with ApoE3-rHDL at the DMPC dose of 5 mg/kg intravenously *via* the tail vein daily for 4 weeks with the age-matched SAMP8 and SAMR1 mice given with normal saline as the controls. The tissue slices were stained with hematoxylin/eosin following standard protocol. Scale bar, 50  $\mu$ m.
